# Supplementary material for: Photophysical and photodynamical study of ellipticine: an anticancer drug molecule in bile salt modulated in vitro created liposome
Source: Royal Society of Chemistry journal article supplement (doi:10.1039/c2cp41708a), 2012-01-01
Supplement: c2cp41708a.pdf [file c2cp41708a.pdf]

# **Photophysical and photodynamical study of ellipticine: an anticancer drug molecule in bile salt modulated in vitro created liposome.**

**Raina Thakur Anupam Das and Anjan Chakraborty\***

Department of Chemistry, Indian Institute of Technology Indore

IET, M-Block, 452017-Ind

## **Author to correspondence:**

\*Dr. Anjan Chakraborty

Department of Chemistry,

Indian Institute of Technology Indore

IET, M-Block, 452017-India

Email: anjan@iiti.ac.in

## **Supporting information**

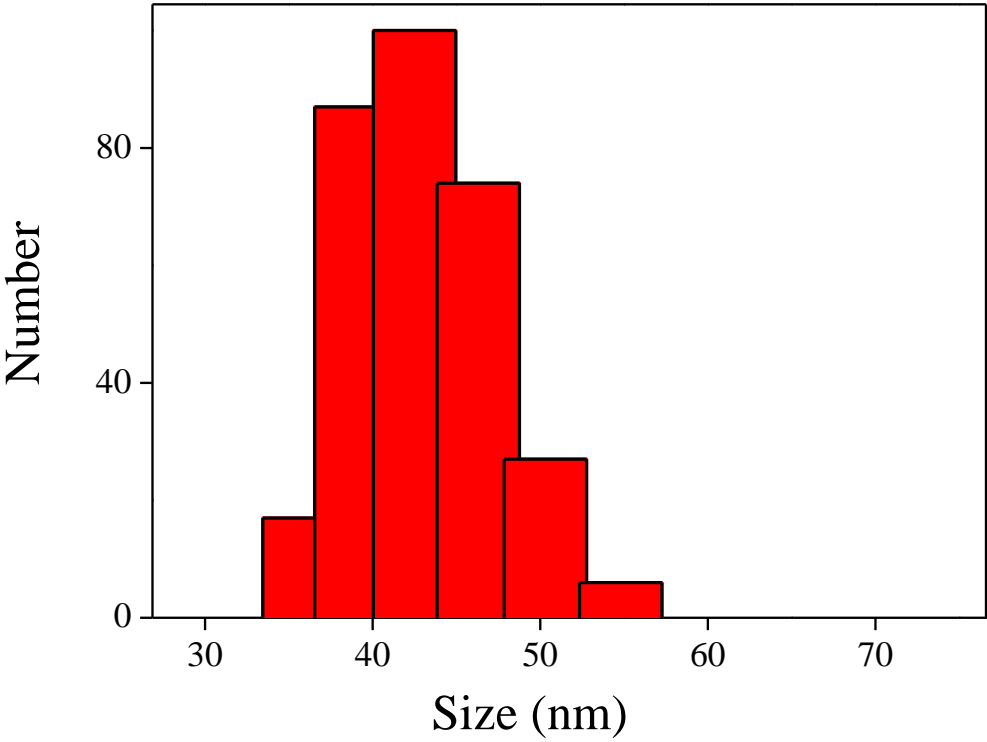

**Figure S1:** Number (%) distribution of DPPC vesicle at room temperature.

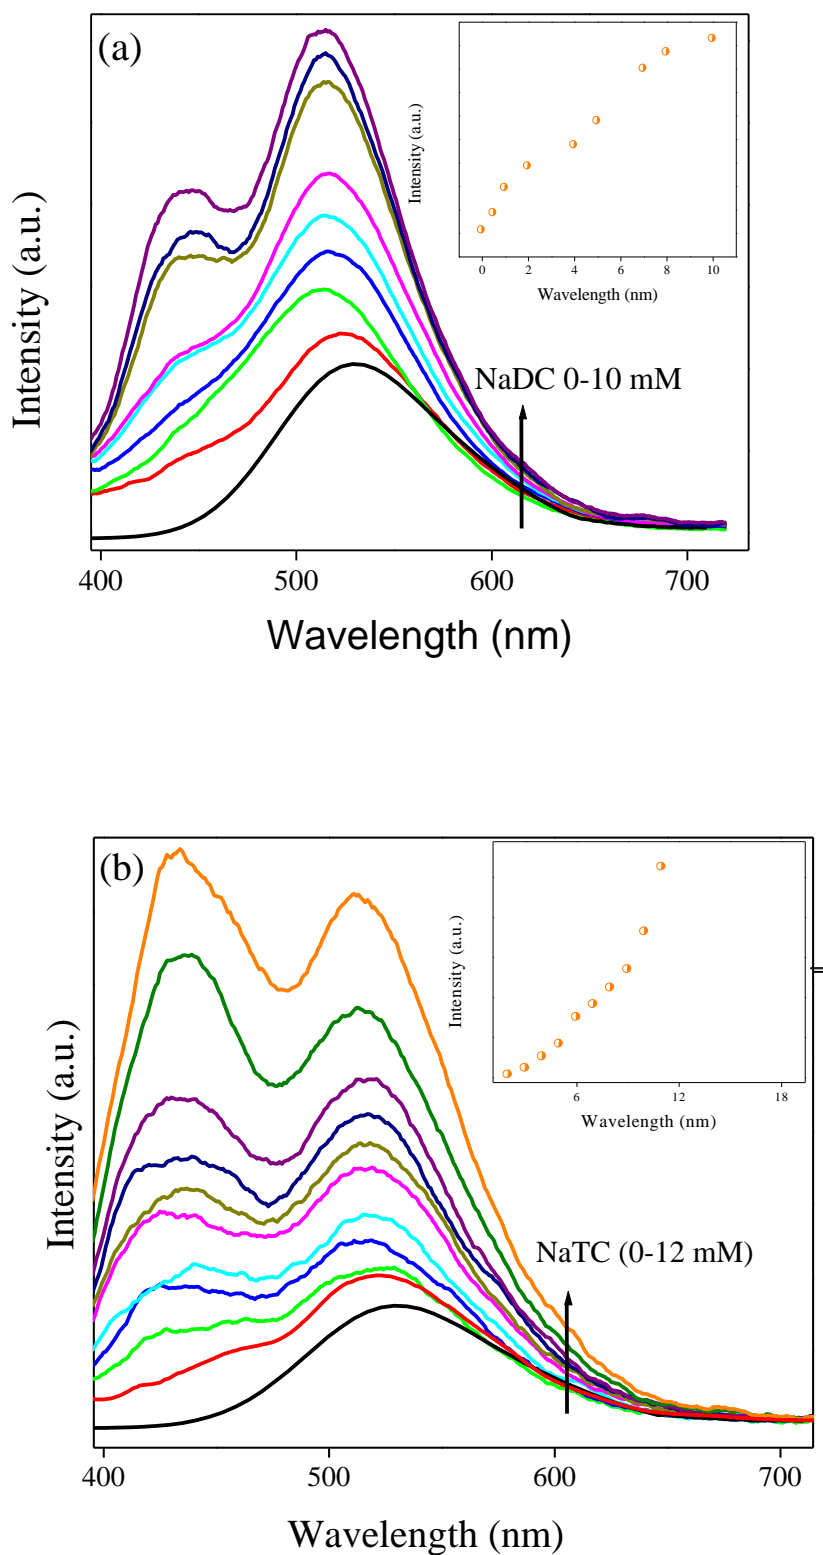

**Figure S2:** (a) Emission spectra of ellipticine at different concentration of NaDC (0-10 mM). In the inset intensity at different concentration of NaDC is shown.

(b) Emission spectra of ellipticine at different concentration of NaTC (0-12 mM). In the inset intensity at different concentration of NaTC is shown.

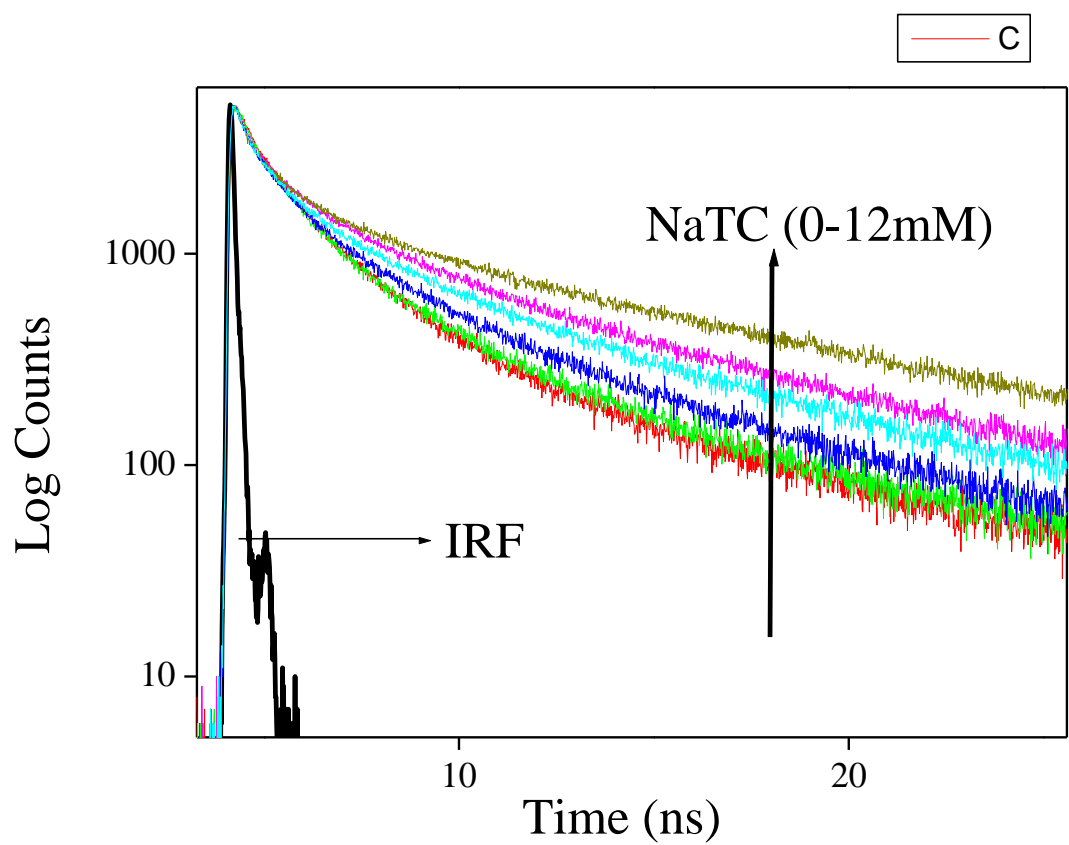

**Figure S2:** Time resolved fluorescence decay of ellipticine at different concentration of NaTC (0-12 mM)
